# Supplementary material for: Pilot Clinical Trial to Evaluate In Situ Calcium Phosphate Cement Injection for Conservative Surgical Management of Appendicular Osteosarcoma in Dogs
Source: Animals (Basel). 2024 May 14;14(10):1460. doi: 10.3390/ani14101460 (PMC11117317; doi:10.3390/ani14101460)
Supplement: Supplementary file 1 [file animals-14-01460-s001.zip]

Archive with 4 entries (4 files):
- Molle et al, Cementoplastie for palliative treatment of osteosarcoma in dog_Supplementary file S1.pdf
- Molle et al, Cementoplastie for palliative treatment of osteosarcoma in dog_Supplementary file S2.xlsx
- Molle et al, Cementoplastie for palliative treatment of osteosarcoma in dog_Supplementary file S3.pdf
- Molle et al, Cementoplastie for palliative treatment of osteosarcoma in dog_Supplementary file S4.xlsx
