# Supplementary material for: Pilot Clinical Trial to Evaluate In Situ Calcium Phosphate Cement Injection for Conservative Surgical Management of Appendicular Osteosarcoma in Dogs
Source: Animals (Basel). 2024 May 14;14(10):1460. doi: 10.3390/ani14101460 (PMC11117317; doi:10.3390/ani14101460)
Supplement: Supplementary file 1 [file animals-14-01460-s001.zip › Molle et al, Cementoplastie for palliative treatment of osteosarcoma in dog_Supplementary file S2.xlsx]

## Sheet: Feuil1
Subject	Molecule	Dosage	Route of administration
1	Propofol	2 mg/kg	IV
	Medetomidine	2,5 µg/kg	IV
	Diazepam	0,25 mg/kg	IV
2	Propofol	2 mg/kg	IV
	Medetomidine	2,5 µg/kg	IV
	Diazepam	0,25 mg/kg	IV
3	Propofol	2 mg/kg	IV
	Medetomidine	2,5 µg/kg	IV
	Diazepam	0,25 mg/kg	IV
4	Propofol	2 mg/kg	IV
	Medetomidine	2,5 µg/kg	IV
	Diazepam	0,25 mg/kg	IV
5	Propofol	4 mg/kg	IV
	Isoflurane	2 to 2,5%	Inhalation
6	Propofol	4 mg/kg	IV
	Isoflurane	2 to 2,5%	Inhalation
7	Propofol	4 mg/kg	IV
	Isoflurane	2 to 2,5%	Inhalation
8	Propofol	2 mg/kg	IV
	Midazolam	0,5 µg/kg	IV
	Isoflurane	2 to 2,5%	Inhalation
9	Aflaxalone	2 mg/kg	IV
	Diazepam	0,25 mg/kg	IV
10	Propofol	4 mg/kg	IV
	Diazepam	0,25 mg/kg	IV
	Isoflurane	2 to 2,5%	Inhalation
11	Aflaxalone	2 mg/kg	IV
	Diazepam	0,25 mg/kg	IV
12	Aflaxalone	2 mg/kg	IV
	Acepromazine	0,5 mg/kg	IM
