# Supplementary material for: Pilot Clinical Trial to Evaluate In Situ Calcium Phosphate Cement Injection for Conservative Surgical Management of Appendicular Osteosarcoma in Dogs
Source: Animals (Basel). 2024 May 14;14(10):1460. doi: 10.3390/ani14101460 (PMC11117317; doi:10.3390/ani14101460)
Supplement: Supplementary file 1 [file animals-14-01460-s001.zip › Molle et al, Cementoplastie for palliative treatment of osteosarcoma in dog_Supplementary file S4.xlsx]

## Sheet: Postoperative analgesics
Subject	Before surgery	Dosage	D0 – after surgery	Dosage	D28	Dosage	D56	Dosage	D183	Dosage
1	Firocoxib	7 mg/kg/d for 7d	No		No		No		NA	NA
			Tramadol	6 mg/kg/d	Tramadol	6 mg/kg/d	Tramadol	6 mg/kg/d
2	Firocoxib	6mg/kg/d for 12d	Firocoxib	6 mg/kg/d	Firocoxib	6 mg/kg/d	Firocoxib	6 mg/kg/d	NA	NA
			Tramadol	6 mg/kg/d	Tramadol	6 mg/kg/d	Tramadol	6 mg/kg/d
3	No		Firocoxib	5.7 mg/kg/d	Firocoxib	5.7 mg/kg/d	Firocoxib	5.7 mg/kg/d	Firocoxib	5.7 mg/kg/d
			Tramadol	6 mg/kg/d	Tramadol	6 mg/kg/d	Tramadol	6 mg/kg/d	Tramadol	6 mg/kg/d
4	No		Firocoxib	4.9 mg/kg/d	Firocoxib	4.9 mg/kg/d	Firocoxib	4.9 mg/kg/d	Firocoxib	4.9 mg/kg/d
			Tramadol	6 mg/kg/d	Tramadol	6 mg/kg/d	Tramadol	6 mg/kg/d	Tramadol	6 mg/kg/d
5	No		Firocoxib	5 mg/kg/d for 16d	NA	NA	NA	NA	NA	NA
			Tramadol	6.59 mg/kg/d for 5d
6	Tramadol	4.2 mg/kg/d for 6d	Tramadol	4.2 mg/kg/d	Tramadol	4.2 mg/kg/d	NA	NA	NA	NA
	Meloxicam	0.1 mg/kg/d for 6d	Meloxicam	0.1 mg/kg/d	Meloxicam	0.1 mg/kg/d
	Gabapentin	9 mg/kg/d for 6d	Gabapentin	9 mg/kg/d	Gabapentin	9 mg/kg/d
7	Tramadol	4.5 mg/kg/d for 19d	Tramadol	4.5 mg/kg/d	Tramadol	4.5 mg/kg/d	NA	NA	NA	NA
	Firocoxib	4.9 mg/kg/d for 19d	Firocoxib	4.9 mg/kg/d	Firocoxib	4.9 mg/kg/d
	Piroxicam	4.9 mg/kg/d for 19d	Piroxicam	4.9 mg/kg/d	Piroxicam	4.9 mg/kg/d
	Gabapentin	6.4mg/kg/d for 19d	Gabapentin	6.4 mg/kg/d	Gabapentin	6.4 mg/kg/d
			Fentanyl patch	0.05mg/kg/d for 4d
8	No		Tramadol	4.5 mg/kg/d for 7d	NA	NA	NA	NA	NA	NA
				4.5 mg/kg/d1
			Firocoxib	7.2 mg/kg/d for 7d
				5.4 mg/kg/d1
			Dexamethasone	0,5 mg/kg/d1
9	No		Tramadol	1.8 mg/kg/d	NA	NA	NA	NA	NA	NA
			Meloxicam	0.2 mg/kg/d for 1d
			Cimicoxib	2.1 mg/kg/d for 3d
10	No		No		NA	NA	NA	NA	NA	NA
11	No		Tramadol	1.6 mg/kg/d	No		Firocoxib	5.2 mg/kg/d	NA	NA
			Meloxicam	0.1 mg/kg/d for 1d2			Meloxicam	0.2 mg/kg/d3
12	No		Meloxicam	0.1 mg/kg/d for 1d	No		NA	NA	NA	NA
			Tramadol	5.9 mg/kg/d for 4d
			Firocoxib	4.8 mg/kg/d for 4d
1Starting 15 days after surgery
2Starting 24 days after surgery
3Starting 31 days after D56 follow-up visit
NA: Not available because of animal’s removal from the study

## Sheet: Preventive antibiotics
Subject	Molecule	Dosage	Duration	Administration time	Route of administration
1	Amoxicillin combined to Clavunalic acid	30 mg/kg	7 days	Day after surgery	per os
2	Amoxicillin combined to Clavunalic acid	30 mg/kg	7 days	Day after surgery	per os
3	Amoxicillin combined to Clavunalic acid	30 mg/kg	7 days	Day after surgery	per os
4	Amoxicillin combined to Clavunalic acid	30 mg/kg	7 days	Day after surgery	per os
5	Cephalexin	20mg/kg	1 day	Day of the surgery	IV
	Cephalexin	20mg/kg	6 days	Day after surgery	per os
6	Cephalexin	20mg/kg	1 day	Day of the surgery	IV
	Cephalexin	30 mg/kg	7 days	Day after surgery	per os
7	Cephalexin	20mg/kg	1 day	Day of the surgery	IV
	Cephalexin	30 mg/kg	7 days	Day after surgery	per os
8	NA	NA	NA	NA	NA
9	Cephalexin	30mg/kg	1 day	Day of the surgery	IV
10	NA	NA	NA	NA	NA
11	NA	NA	NA	NA	NA
12	NA	NA	NA	NA	NA
NA: Not applicable
